# Supplementary material for: EPICE cohort: two-year neurodevelopmental outcomes after very preterm birth
Source: PubMed Central journal article supplement — Arch Dis Child Fetal Neonatal Ed. 2019 Nov 5;105(4):350–6. doi: 10.1136/archdischild-2019-317418 (PMC7363786; doi:10.1136/archdischild-2019-317418), 2019-11-05
Supplement: fetalneonatal-2019-317418supp001.pdf [file fetalneonatal-2019-317418supp001.pdf]

**Table S1: Mother and infant characteristics by country among responders at 2 years corrected age: EPICE cohort**

| Region          | Number of responders | Mother's age      | Parity % nulliparous | Multiple pregnancy | Foreign born mother(1) | Primary and secondary education only (2) | Gestational age | Gestational age < 26 wks | Birthweight       | Male               | IVH/cPVL (3)     | severe NEC (4)  | ROP (5)          | BDP (6)           | Any severe morbidity (7) |
|-----------------|----------------------|-------------------|----------------------|--------------------|------------------------|------------------------------------------|-----------------|--------------------------|-------------------|--------------------|------------------|-----------------|------------------|-------------------|--------------------------|
|                 | N                    | mean (sd)         | n (%)                | n (%)              | n (%)                  | n (%)                                    | mean (sd)       | n (%)                    | mean (sd)         | n (%)              | n (%)            | n (%)           | n (%)            | n (%)             | n (%)                    |
| Belgium         | 307                  | 30 (4.4)          | 117 (38.5)           | 123 (40.1)         | 57 (18.8)              | 127 (42.2)                               | 29.1 (1.8)      | 18 (5.9)                 | 1355 (379)        | 184 (59.9)         | 14 (5)           | 4 (1.3)         | 14 (4.6)         | 38 (12.5)         | 29 (10.4)                |
| Denmark         | 180                  | 30.8 (5.3)        | 61 (34.1)            | 81 (45)            | 18 (10.1)              | 27 (15.3)                                | 28.6 (2)        | 14 (7.8)                 | 1212 (341)        | 88 (48.9)          | 5 (2.9)          | 4 (2.2)         | 4 (2.3)          | 17 (10.2)         | 12 (7.1)                 |
| Estonia         | 137                  | 31.8 (5.9)        | 76 (55.5)            | 33 (24.1)          | 9 (6.6)                | 45 (33.6)                                | 28.8 (2.1)      | 13 (9.5)                 | 1306 (367)        | 73 (53.3)          | 10 (7.3)         | 3 (2.2)         | 11 (8)           | 16 (11.7)         | 20 (14.6)                |
| Germany         | 421                  | 31.8 (5.2)        | 144 (34.6)           | 176 (41.8)         | 119 (28.8)             | 216 (53.1)                               | 28.7 (2.1)      | 41 (9.7)                 | 1225 (385)        | 231 (54.9)         | 16 (3.8)         | 5 (1.2)         | 19 (4.5)         | 35 (8.3)          | 36 (8.6)                 |
| Italy           | 722                  | 34.1 (5.8)        | 257 (35.9)           | 245 (33.9)         | 184 (25.6)             | 453 (63.5)                               | 28.9 (2)        | 45 (6.2)                 | 1240 (373)        | 345 (47.8)         | 47 (6.5)         | 11 (1.5)        | 31 (4.3)         | 63 (8.8)          | 76 (10.6)                |
| The Netherlands | 229                  | 30.9 (4.9)        | 66 (28.8)            | 57 (24.9)          | 27 (11.8)              | 39 (17.3)                                | 28.7 (2.1)      | 18 (7.9)                 | 1222 (374)        | 103 (45)           | 18 (8)           | 6 (2.6)         | 3 (1.3)          | 41 (18)           | 24 (10.6)                |
| Poland          | 189                  | 29.4 (5.6)        | 99 (52.7)            | 43 (22.8)          | 1 (0.5)                | 106 (56.7)                               | 28.9 (2.2)      | 21 (11.1)                | 1347 (406)        | 105 (55.6)         | 21 (11.1)        | 8 (4.2)         | 22 (11.7)        | 18 (9.5)          | 42 (22.3)                |
| Portugal        | 408                  | 31.4 (5.5)        | 138 (33.9)           | 128 (31.4)         | 75 (18.6)              | 228 (56.6)                               | 28.8 (1.9)      | 21 (5.2)                 | 1187 (342)        | 239 (58.6)         | 25 (6.1)         | 5 (1.2)         | 19 (4.7)         | 49 (12)           | 44 (10.8)                |
| UK              | 540                  | 30.3 (5.9)        | 224 (41.6)           | 158 (29.3)         | 74 (13.9)              | 175 (35)                                 | 28.9 (2.1)      | 49 (9.1)                 | 1268 (364)        | 295 (54.6)         | 45 (8.4)         | 15 (2.8)        | 24 (4.4)         | 129 (24.3)        | 71 (13.2)                |
| Sweden          | 161                  | 32.6 (5.3)        | 61 (37.9)            | 44 (27.3)          | 46 (28.8)              | 68 (42.5)                                | 28.6 (2.1)      | 23 (14.3)                | 1312 (421)        | 91 (56.5)          | 6 (3.7)          | 2 (1.2)         | 7 (4.5)          | 27 (16.8)         | 12 (7.6)                 |
| <b>Total</b>    | <b>3294</b>          | <b>31.6 (5.7)</b> | <b>1243 (38)</b>     | <b>1088 (33)</b>   | <b>610 (18.7)</b>      | <b>1484 (46.3)</b>                       | <b>28.8 (2)</b> | <b>263 (8)</b>           | <b>1257 (376)</b> | <b>1754 (53.3)</b> | <b>207 (6.4)</b> | <b>63 (1.9)</b> | <b>154 (4.7)</b> | <b>433 (13.3)</b> | <b>366 (11.3)</b>        |

Notes: definition

(1) data come from 2 years follow-up

(2) Early childhood or primary, Low er secondary and Upper secondary put together

(3) IVH (grade III or IV) or cPVL

(4) NEC requiring surgery or perionial drainage

(5) ROP with a grade III, IV or V

(6) Oxygen or respiratory support at 36 weeks GA

(7) IVH/cPVL, severe NEC or ROP

**Table S2a. Comparison of babies aged ≥ 27 weeks of GA and those < 27 weeks of GA for each type of impairment at 2 years corrected age and by country: EPICE cohort**

| Country | Neurodevelopmental Impairment | Neurosensory Impairment | Non Verbal Cognitive Impairment |
|---------|-------------------------------|-------------------------|---------------------------------|
|---------|-------------------------------|-------------------------|---------------------------------|

|                 | 27 - 31 wks        | < 27 wks          | 27 - 31 wks            | < 27 wks              | RR         | P-value    | 27 - 31 wks           | < 27 wks             | RR         | P-value     | 27 - 31 wks            | < 27 wks              | RR         | p-value     |
|-----------------|--------------------|-------------------|------------------------|-----------------------|------------|------------|-----------------------|----------------------|------------|-------------|------------------------|-----------------------|------------|-------------|
|                 | N (%)              | N (%)             | n (%)                  | n (%)                 |            |            | n (%)                 | n (%)                |            |             | n (%)                  | n (%)                 |            |             |
| Belgium         | 273 (88.9)         | 34 (11.1)         | 47/269 (17.5)          | 11/31 (35.5)          | 2.0        | 0.0        | 10/270 (3.7)          | 4/32 (12.5)          | 3.4        | 0.05        | 47/271 (17.3)          | 10/31 (32.3)          | 1.9        | 0.04        |
| Denmark         | 152 (84.4)         | 28 (15.6)         | 24/149 (16.1)          | 7/27 (25.9)           | 1.6        | 0.2        | 4/150 (2.7)           | 0/27 (0)             | ..         | 1.00        | 20/151 (13.2)          | 7/28 (25)             | 1.9        | 0.11        |
| Estonia         | 114 (83.2)         | 23 (16.8)         | 14/112 (12.5)          | 3/21 (14.3)           | 1.1        | 0.7        | 7/112 (6.3)           | 1/21 (4.8)           | 0.8        | 1.00        | 12/114 (10.5)          | 2/23 (8.7)            | 0.8        | 1.00        |
| Germany         | 344 (81.7)         | 77 (18.3)         | 36/334 (10.8)          | 21/75 (28)            | 2.6        | 0.0        | 16/338 (4.7)          | 11/76 (14.5)         | 3.1        | 0.00        | 31/340 (9.1)           | 18/75 (24)            | 2.6        | 0.00        |
| Italy           | 627 (86.8)         | 95 (13.2)         | 95/618 (15.4)          | 21/95 (22.1)          | 1.4        | 0.1        | 27/616 (4.4)          | 12/95 (12.6)         | 2.9        | 0.00        | 84/626 (13.4)          | 20/95 (21.1)          | 1.6        | 0.05        |
| The Netherlands | 180 (78.6)         | 49 (21.4)         | 17/177 (9.6)           | 6/49 (12.2)           | 1.3        | 0.6        | 4/179 (2.2)           | 3/49 (6.1)           | 2.8        | 0.17        | 16/178 (9)             | 5/49 (10.2)           | 1.1        | 0.78        |
| Poland          | 153 (81)           | 36 (19.1)         | 38/152 (25)            | 11/36 (30.6)          | 1.2        | 0.5        | 12/151 (7.9)          | 5/36 (13.9)          | 1.8        | 0.33        | 35/151 (23.2)          | 11/36 (30.6)          | 1.3        | 0.36        |
| Portugal        | 350 (85.8)         | 58 (14.2)         | 52/337 (15.4)          | 13/52 (25)            | 1.6        | 0.1        | 10/339 (2.9)          | 2/53 (3.8)           | 1.3        | 0.67        | 47/347 (13.5)          | 13/57 (22.8)          | 1.7        | 0.07        |
| UK              | 458 (84.8)         | 82 (15.2)         | 70/384 (18.2)          | 26/71 (36.6)          | 2.0        | 0.0        | 29/433 (6.7)          | 12/76 (15.8)         | 2.4        | 0.01        | 61/396 (15.4)          | 20/72 (27.8)          | 1.8        | 0.01        |
| Sweden          | 134 (83.2)         | 27 (16.8)         | 23/130 (17.7)          | 9/27 (33.3)           | 1.9        | 0.1        | 1/132 (0.8)           | 3/27 (11.1)          | 13.9       | 0.02        | 23/132 (17.4)          | 9/27 (33.3)           | 1.9        | 0.06        |
| <b>Total</b>    | <b>2785 (84.6)</b> | <b>509 (15.5)</b> | <b>416/2662 (15.6)</b> | <b>128/484 (26.4)</b> | <b>1.7</b> | <b>0.0</b> | <b>120/2720 (4.4)</b> | <b>53/492 (10.8)</b> | <b>2.4</b> | <b>0.00</b> | <b>376/2706 (13.9)</b> | <b>115/493 (23.3)</b> | <b>1.7</b> | <b>0.00</b> |

Note: p-value calculated with the Fisher test when value <=5

RR = prevalence in < 27 wks divided by prevalence in 27 - 31 wks

**Table S2b. Comparison of babies aged  $\geq 28$  weeks of GA and those  $< 28$  weeks of GA for each type of impairment at 2 years corrected age and by country: EPICE cohort**

| Country         | 28 - 31 wks        |                   | Neurodevelopmental Impairment |                       |            |             | Neurosensory Impairment |                      |            |             | Non Verbal Cognitive Impairment |                       |            |             |
|-----------------|--------------------|-------------------|-------------------------------|-----------------------|------------|-------------|-------------------------|----------------------|------------|-------------|---------------------------------|-----------------------|------------|-------------|
|                 | 28 - 31 wks        | < 28 wks          | 28 - 31 wks                   | < 28 wks              |            |             | 28 - 31 wks             | < 28 wks             |            |             | 28 - 31 wks                     | < 28 wks              |            |             |
|                 | N (%)              | N (%)             | n (%)                         | n (%)                 | RR         | p-value     | n (%)                   | n (%)                | RR         | p-value     | n (%)                           | n (%)                 | RR         | p-value     |
| Belgium         | 250 (81.4)         | 57 (18.6)         | 41/246 (16.7)                 | 17/54 (31.5)          | 1.9        | 0.01        | 5/247 (2)               | 9/55 (16.4)          | 8.2        | 0.00        | 41/248 (16.5)                   | 16/54 (29.6)          | 1.8        | 0.03        |
| Denmark         | 122 (67.8)         | 58 (32.2)         | 19/119 (16)                   | 12/57 (21.1)          | 1.3        | 0.41        | 2/120 (1.7)             | 2/57 (3.5)           | 2.1        | 0.60        | 17/121 (14)                     | 10/58 (17.2)          | 1.2        | 0.58        |
| Estonia         | 100 (73)           | 37 (27)           | 12/99 (12.1)                  | 5/34 (14.7)           | 1.2        | 0.77        | 5/99 (5.1)              | 3/34 (8.8)           | 1.7        | 0.42        | 11/100 (11)                     | 3/37 (8.1)            | 0.7        | 0.76        |
| Germany         | 301 (71.5)         | 120 (28.5)        | 27/293 (9.2)                  | 30/116 (25.9)         | 2.8        | 0.00        | 10/295 (3.4)            | 17/119 (14.3)        | 4.2        | 0.00        | 22/299 (7.4)                    | 27/116 (23.3)         | 3.2        | 0.00        |
| Italy           | 549 (76)           | 173 (24)          | 77/541 (14.2)                 | 39/172 (22.7)         | 1.6        | 0.01        | 20/540 (3.7)            | 19/171 (11.1)        | 3          | 0.00        | 68/548 (12.4)                   | 36/173 (20.8)         | 1.7        | 0.01        |
| The Netherlands | 161 (70.3)         | 68 (29.7)         | 12/158 (7.6)                  | 11/68 (16.2)          | 2.1        | 0.06        | 2/160 (1.3)             | 5/68 (7.4)           | 5.7        | 0.03        | 11/159 (6.9)                    | 10/68 (14.7)          | 2.1        | 0.06        |
| Poland          | 141 (74.6)         | 48 (25.4)         | 33/140 (23.6)                 | 16/48 (33.3)          | 1.4        | 0.18        | 11/139 (7.9)            | 6/48 (12.5)          | 1.6        | 0.38        | 30/139 (21.6)                   | 16/48 (33.3)          | 1.5        | 0.10        |
| Portugal        | 296 (72.5)         | 112 (27.5)        | 43/284 (15.1)                 | 22/105 (21)           | 1.4        | 0.17        | 9/287 (3.1)             | 3/105 (2.9)          | 0.9        | 1.00        | 39/293 (13.3)                   | 21/111 (18.9)         | 1.4        | 0.16        |
| UK              | 413 (76.5)         | 127 (23.5)        | 64/351 (18.2)                 | 32/104 (30.8)         | 1.7        | 0.01        | 26/391 (6.6)            | 15/118 (12.7)        | 1.9        | 0.03        | 55/362 (15.2)                   | 26/106 (24.5)         | 1.6        | 0.03        |
| Sweden          | 118 (73.3)         | 43 (26.7)         | 17/114 (14.9)                 | 15/43 (34.9)          | 2.3        | 0.01        | 0/116 (0)               | 4/43 (9.3)           | ..         | 0.01        | 17/116 (14.7)                   | 15/43 (34.9)          | 2.4        | 0.01        |
| <b>Total</b>    | <b>2451 (74.4)</b> | <b>843 (25.6)</b> | <b>345/2345 (14.7)</b>        | <b>199/801 (24.8)</b> | <b>1.7</b> | <b>0.00</b> | <b>90/2394 (3.8)</b>    | <b>83/818 (10.1)</b> | <b>2.7</b> | <b>0.00</b> | <b>311/2385 (13)</b>            | <b>180/814 (22.1)</b> | <b>1.7</b> | <b>0.00</b> |

Note: p-value calculated with the Fisher test when value  $\leq 5$

RR = prevalence in  $< 28$  wks divided by prevalence in 28 - 31 wks

Table S3. Comparison of babies aged more than 26 months and those aged between 22 and 26 months corrected age for each type of impairment and by country: EPICE cohort

| Region          |                  |                    | Neurodevelopmental impairment |                        |             | Neurosensory impairment |                       |             | Non verbal cognitive impairment |                        |             |
|-----------------|------------------|--------------------|-------------------------------|------------------------|-------------|-------------------------|-----------------------|-------------|---------------------------------|------------------------|-------------|
|                 | >26 months       | 22m-26m            | >26 months                    | 22m-26m                | P-value     | >26 months              | 22m-26m               | p-value     | >26 months                      | 22m-26m                | p-value     |
|                 | N (%)            | N (%)              | n (%)                         | n (%)                  |             | n (%)                   | n (%)                 |             | n (%)                           | n (%)                  |             |
| Belgium         | 7 (2.37)         | 288 (97.63)        | 1/6 (16.7)                    | 55/283 (19.4)          | 1.00        | 1/6 (16.7)              | 11/285 (3.9)          | 0.23        | 1/6 (16.7)                      | 54/285 (18.9)          | 1.00        |
| Denmark         | 5 (3.14)         | 154 (96.86)        | 0/5 (0)                       | 27/151 (17.9)          | 0.59        | 0/5 (0)                 | 3/152 (2)             | 1.00        | 0/5 (0)                         | 24/153 (15.7)          | 1.00        |
| Estonia         | 1 (0.73)         | 136 (99.27)        | 0/1 (0)                       | 17/132 (12.9)          | 1.00        | 0/1 (0)                 | 8/132 (6.1)           | 1.00        | 0/1 (0)                         | 14/136 (10.3)          | 1.00        |
| Germany         | 49 (11.89)       | 363 (88.11)        | 7/48 (14.6)                   | 49/352 (13.9)          | 0.83        | 5/48 (10.4)             | 22/357 (6.2)          | 0.35        | 5/49 (10.2)                     | 43/357 (12)            | 0.82        |
| Italy           | 114 (15.88)      | 604 (84.12)        | 11/110 (10)                   | 104/599 (17.4)         | 0.07        | 6/110 (5.5)             | 33/597 (5.5)          | 1.00        | 10/114 (8.8)                    | 93/603 (15.4)          | 0.08        |
| The Netherlands | 10 (4.5)         | 212 (95.5)         | 0/9 (0)                       | 22/210 (10.5)          | 0.60        | 0/9 (0)                 | 6/212 (2.8)           | 1.00        | 0/10 (0)                        | 20/210 (9.5)           | 0.60        |
| Poland          | 0 (0)            | 189 (100)          | --                            | 49/188 (26.1)          |             | --                      | 17/187 (9.1)          |             | --                              | 46/187 (24.6)          |             |
| Portugal        | 26 (6.37)        | 382 (93.63)        | 2/22 (9.1)                    | 63/367 (17.2)          | 0.55        | 0/23 (0)                | 12/369 (3.3)          | 1.00        | 2/25 (8)                        | 58/379 (15.3)          | 0.56        |
| UK              | 86 (16.14)       | 447 (83.86)        | 5/27 (18.5)                   | 90/424 (21.2)          | 1.00        | 4/79 (5.1)              | 36/424 (8.5)          | 0.37        | 2/25 (8)                        | 79/440 (18)            | 0.28        |
| Sweden          | 0 (0)            | 161 (100)          | --                            | 32/157 (20.4)          |             | --                      | 4/159 (2.5)           |             | --                              | 32/159 (20.1)          |             |
| <b>Total</b>    | <b>298 (9.2)</b> | <b>2936 (90.8)</b> | <b>26/228 (11.4)</b>          | <b>508/2863 (17.7)</b> | <b>0.01</b> | <b>16/281 (5.7)</b>     | <b>152/2874 (5.3)</b> | <b>0.78</b> | <b>20/235 (8.5)</b>             | <b>463/2909 (15.9)</b> | <b>0.00</b> |

Note:

45 children aged &lt; 22 months were not used in this comparison

p-value calculated with the Fisher test
